# Supplementary material for: A molecularly imprinted nanocavity-based fluorescence polarization assay platform for cortisol sensing
Source: Royal Society of Chemistry journal article supplement (doi:10.1039/c5tb02069g), 2016-01-01
Supplement: c5tb02069g1.pdf [file c5tb02069g1.pdf]

## A molecularly imprinted nanocavity-based fluorescence polarization assay platform for cortisol sensing

Nobuo Murase<sup>1</sup>, Shin-ichi Taniguchi<sup>2</sup>, Eri Takano<sup>1</sup>, Yukiya Kitayama<sup>1</sup> and Toshifumi Takeuchi<sup>1\*</sup>

1. Graduate School of Engineering, Kobe University, 1-1, Rokkodai-cho, Nada-ku, Kobe 657-8501, Japan  
E-mail: takeuchi@gold.kobe-u.ac.jp; Fax: +81 78 803 6158; Tel: +81 78 803 6158
2. Research & Development Group, Hitachi, Ltd., 292 Yoshida-cho, Totsuka-ku, Yokohama 244-0817, Japan

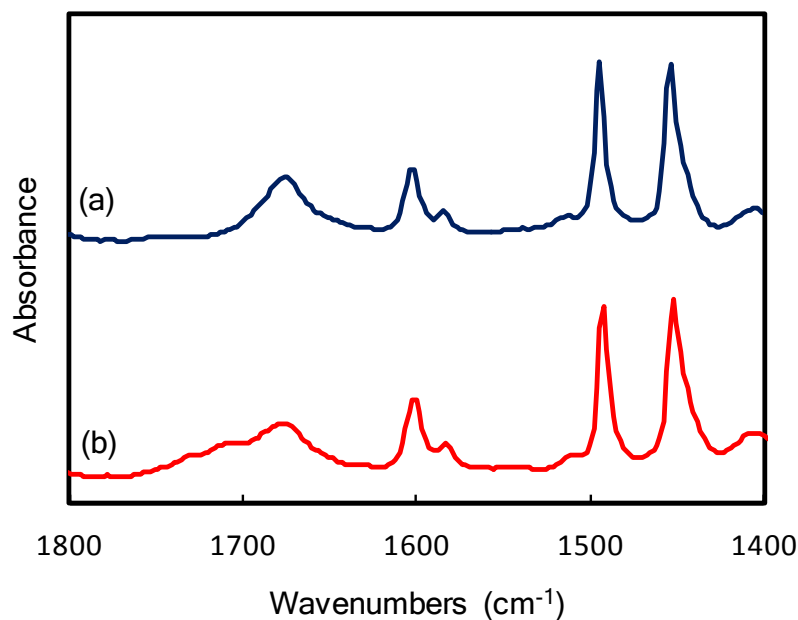

**Figure S1.** FT-IR spectra of P(S-DVB) seed particles (a) and MIP-NPs (b).

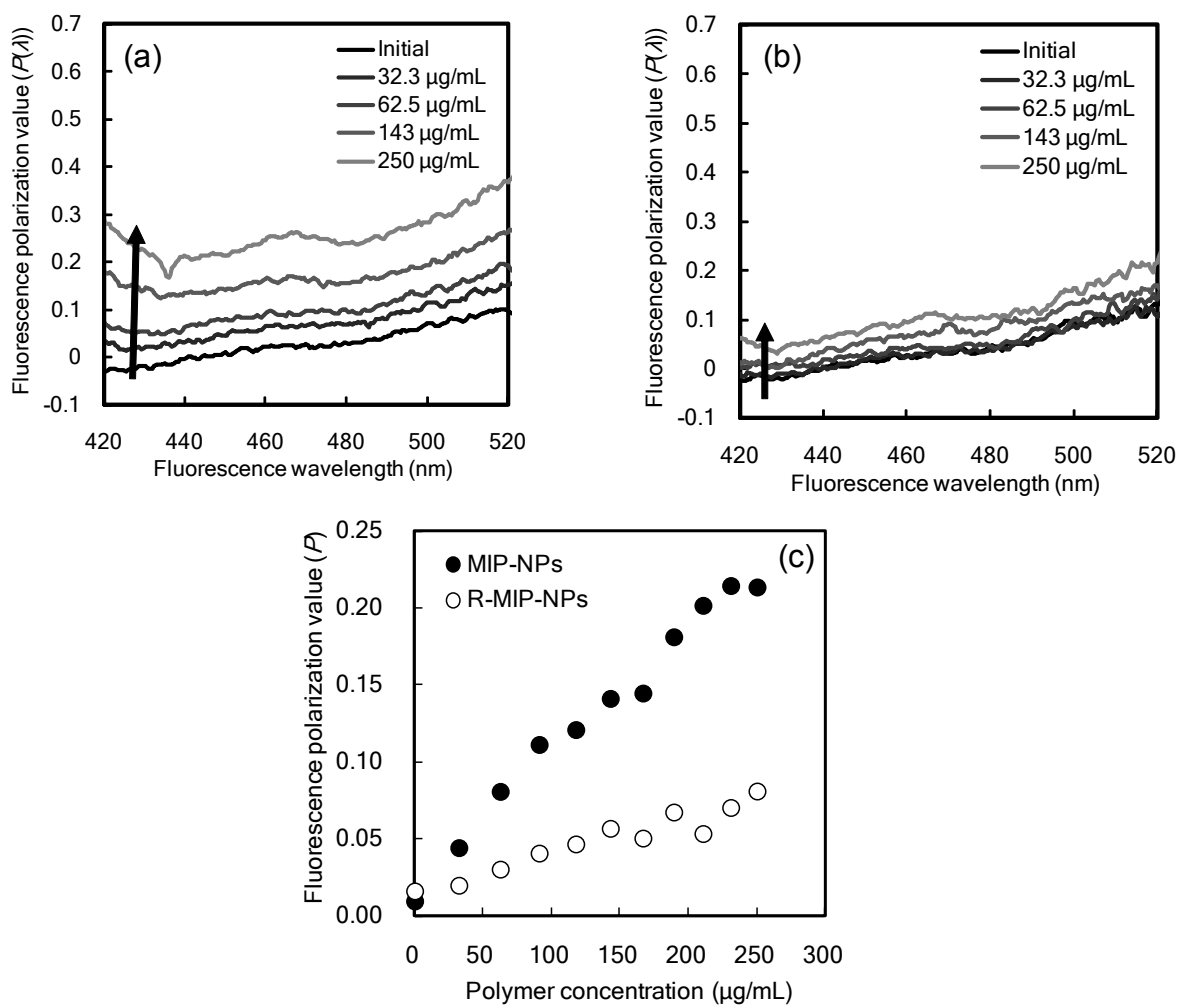

**Figure S2.** Fluorescence polarization behaviors of dansyl-cortisol with titration of MIP-NPs (a) and R-MIP-NPs (b), and concentration dependence of the  $P$  values at 450 nm on the titration of MIP-NPs and R-MIP-NPs (final concentrations: 32.3–250  $\mu\text{g/mL}$ ) (c).
